# Supplementary material
Source: publisher figshare collection journal article supplement (https://acs.figshare.com/ndownloader/files/13039628)

## Supporting Information

### **Nanoplastic Ingestion Enhances Toxicity of Persistent Organic Pollutants (POPs) in the Monogonont Rotifer *Brachionus koreanus* via Multixenobiotic Resistance (MXR) Disruption**

**Chang-Bum Jeong<sup>a,#</sup>, Hye-Min Kang<sup>a,#</sup>, Young Hwan Lee<sup>a</sup>, Min-Sub Kim<sup>a</sup>, Jin-Sol Lee<sup>a</sup>, Jung Soo Seo<sup>b</sup>, Minghua Wang<sup>c</sup>, and Jae-Seong Lee<sup>a,\*</sup>**

<sup>a</sup>Department of Biological Science, College of Science, Sungkyunkwan University, Suwon 16419, South Korea

<sup>b</sup>Pathology Division, National Institute of Fisheries Science, Busan 46083, South Korea

<sup>c</sup>Key Laboratory of the Ministry of Education for Coastal and Wetland Ecosystems/College of the Environment & Ecology, Xiamen University, Xiamen 361102, China

---

\*Corresponding author: Department of Biological Science, College of Science, Sungkyunkwan University, Suwon 16419, South Korea.

Tel.: 82 31 290 7011; E-mail: jslee2@skku.edu (J.-S. Lee)

## Supplementary Figure legend

**Fig. S1** Survival rate of rotifers exposed to BDE-47 (A) and TCS (B) in the absence or presence of inhibitors that are specific to P-gp (verapamil) and MRP (MK571). Different letters above columns indicate significant differences ( $P < 0.05$ ).

**A)**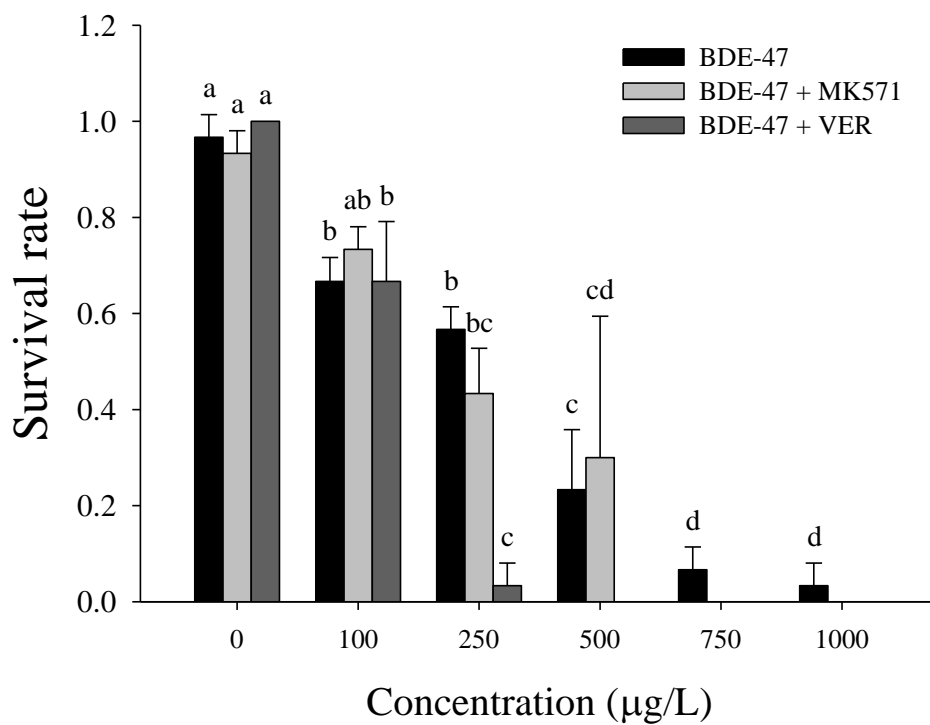**B)**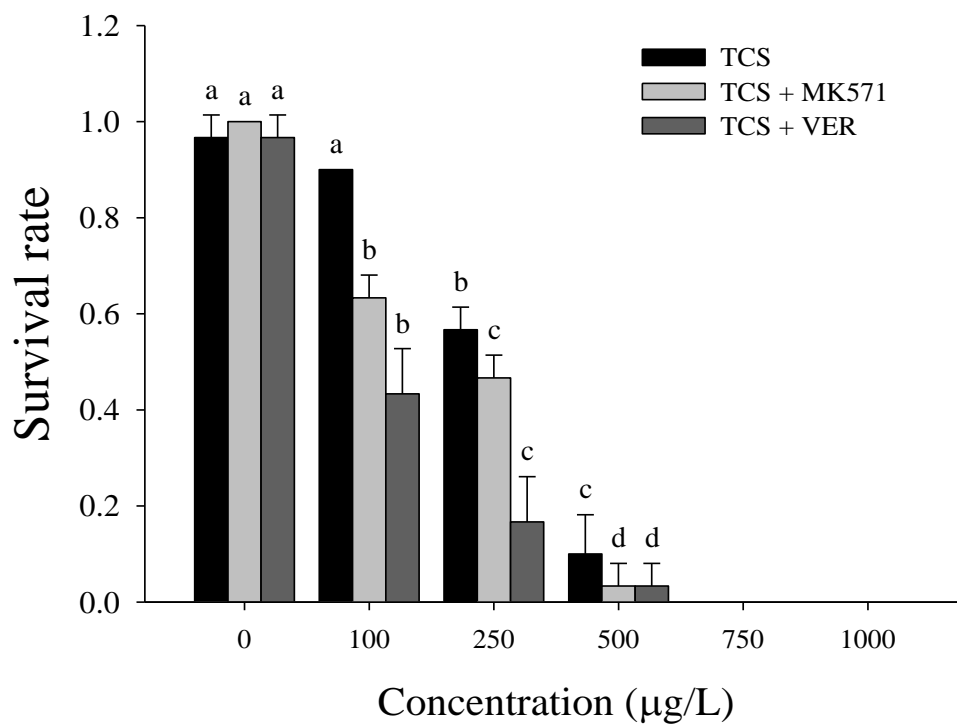

Supplement: Supplementary file 1 [file 13039628]
